# Supplementary material for: A complex regulatory landscape involved in the development of mammalian external genitals
Source: eLife. 2020 Apr 17;9:e52962. doi: 10.7554/eLife.52962 (PMC7185996; doi:10.7554/eLife.52962)
Supplement: Figure 4—source data 1. [file elife-52962-fig4-data1.xlsx]

## Sheet: Hoxd13 RTqPCR Figure4C
	WT				Del(Prox)
Hoxd13	1.09	0.84	1.06	1.01	0.65	0.62	0.71	0.68
