# Supplementary material for: A complex regulatory landscape involved in the development of mammalian external genitals
Source: eLife. 2020 Apr 17;9:e52962. doi: 10.7554/eLife.52962 (PMC7185996; doi:10.7554/eLife.52962)
Supplement: Figure 6—source data 1. [file elife-52962-fig6-data1.xlsx]

## Sheet: Hoxd13 RTqPCR Figure6B
	WT			Del(III)
Hoxd13	1.03807	0.905106	1.05682	0.858138	0.907284	0.94676
	WT				Del(Is-IV)
Hoxd13	1.06819	0.761673	1.03655	1.13359	0.816625	0.973926	1.08183	1.00678
	WT					Del(V)
Hoxd13	1.07669	0.683271	1.02061	1.02393	1.19549	1.03761	0.844635	1.08124	1.07076	1.02355
	WT				Inv(V)
Hoxd13	0.810999	1.2616	1.04578	0.881624	1.00429	0.994861	1.31162	0.94284
	WT					Del(GT2)
Hoxd13	0.958963	0.981117	1.25005	0.919899	0.889976	0.938191	0.828447	0.978652	0.820409

## Sheet: RTqPCR Figure6-sup figure1D
	WT						Del(GT2)
Hoxd13	1.07188	1.20684	0.997913	0.910217	0.87579	0.937364	0.747451	0.607399	0.596768	0.596654	1.03752	0.834891
