# Supplementary material for: A complex regulatory landscape involved in the development of mammalian external genitals
Source: eLife. 2020 Apr 17;9:e52962. doi: 10.7554/eLife.52962 (PMC7185996; doi:10.7554/eLife.52962)
Supplement: Supplementary file 1. [file elife-52962-supp1.xlsx]

## Sheet: Table 1
Table 1: List of genotyping primers
Allele	Primer name	Sequence	Product Size (bp)
Del(Prox)	590	GACTGTGTTTTGAGGAGGACAGTG	PCR 590-591: WT: 488bp PCR 594-597: Del:369bp
	591	CTGTGGCAGTAAGAGTGTGCTGAG
	594	CCCAGCTGCAGCAGAAGACC
	597	GTTTCAAAAGGCAAGTCCATGACTCTCTG
Del(GT2)	435	TGGGTACAGTTTGGCTCCAT	PCR 435-436: WT: 575bp PCR 433-436: Del: 500bp
	436	GCCCTTGGTGGCATGTTTAG
	433	CTGCCACCTACCTTCTCCTC
Del(V) and Inv(V)	RA7	GCTTGTGTCTTGCTGTGTCA	PCR RA7-RA8: WT: 419bp PCR RA7-RA10: Del:440bp PCR RA7-RA9: Inv: approx 300bp
	RA8	AAGGAAAGTGTGTGTGCTGG
	RA9	CCGAATCCCTAGCTGTCGAG
	RA10	CATCTGTAGGTTCTGTGCTTATG
Del(IV)	502	CAGTTCTTTTCCACGGTGAGGAAGC	PCR 502-503: WT: 504bp PCR 501-507: Del: approx 450bp
	503	CACAAAGATGTGTCAAAGTTGGGGCTG
	501	CCTCTTGAACCACGTGCATCGC
	507	GCCAGCAGGAATAGCTATACTAACAGG
Del(IIIE)	545	GGAGAGCTCTGGGTGTGATTGC	PCR 545-542: Wt: 397bp PCR 537-544: Del: 600bp
	542	TGGGAAGTGTGGAGTCTTCTGCC
	537	CCCTTCCCCCTATCACTGTATCTCC
	544	CAGACCTTTGCAGTAGGGTCATGG
Del(IV-SB)	RA21	TCTGCCTCCGTTCTCACAAT	PCR RA21-RA22: Wt: 480bp PCR RA21-RA24: Del:300bp
	RA22	GGACCATCAAGAAGCATCCG
	RA24	GCACTAATCCAAAGCCAGCA
