# Supplementary material for: A complex regulatory landscape involved in the development of mammalian external genitals
Source: eLife. 2020 Apr 17;9:e52962. doi: 10.7554/eLife.52962 (PMC7185996; doi:10.7554/eLife.52962)
Supplement: Supplementary file 2. [file elife-52962-supp2.xlsx]

## Sheet: Table 2
Table 2: List of sgRNAs
Allele	5' sgRNA sequence	3' sgRNA sequence	Deletion size	Inversion size	Deletion coordenates	Inversion coordenates
Del(Prox)	ATCTATCACTATTTGCTCCC	ACGATACTTAAGACCTAGTC	13,007 bp		chr2:74614383-74627389
Del(GT2)	CAGAGATCTGCTTGGCACGT	GCAGTGCGTGCTGGTTCGCC	3,139 bp		chr2:74406195-74409333
Del(V)/Inv(V)	TCAAATCGTACAGCGCTGCC	CACGGGGTGGAGTTATCTAC	14,269 bp	14,284 bp	chr2:74292230-74306498	chr2:74292221- 74306504
Del(IV)	CGCAAAGGCAGATGCGACTT	CTTGCCGCTTGACCTGCTAA	11,106 bp		chr2:74264016-74275121
Del(IIIE)	TAGAATCATTGGTAGTACGG	TGGTTCTAAGATTTCCGTAA	39,050 bp		chr2:74183850-74222899
Del(IV-SB)	CTCTTGTTCTTGATCGACAT	CTTGCCGCTTGACCTGCTAA	154,723 bp		chr2:74120399-74275121
