# Supplementary material for: A complex regulatory landscape involved in the development of mammalian external genitals
Source: eLife. 2020 Apr 17;9:e52962. doi: 10.7554/eLife.52962 (PMC7185996; doi:10.7554/eLife.52962)
Supplement: Supplementary file 3. [file elife-52962-supp3.xlsx]

## Sheet: Table 3
Table 3: List of fosmids
Clone Name	Coordinates	Length
WI1-1879J12 (island IV)	chr2:74235922-74281101	45180 bps
WI1-2556D5 (island III)	chr2:74180517-74223072	42556 bps
WI1-1741G6 (island V)	chr2:74270669-74309212	38544 bps
WI1-1129A16 (between is-III/SB)	chr2:74141402-74180933	39532 bps
WI1-109B16 (between is-V/GT2)	chr2:74346499-74384278	37780 bps
