# Supplementary material for: A complex regulatory landscape involved in the development of mammalian external genitals
Source: eLife. 2020 Apr 17;9:e52962. doi: 10.7554/eLife.52962 (PMC7185996; doi:10.7554/eLife.52962)
Supplement: Supplementary file 4. [file elife-52962-supp4.xlsx]

## Sheet: Table 4
Table 4: List of primers used for recombineering
Primer name	Sequence 5’ > 3’
WI1-2556D5 (island III) Fw	CAGTTCTCAGTCTTCAACTTGCTGAGTCAAAAATCTGTTGTTCCTGTATTGCTCGAGGTCGACGGTATCG
WI1-2556D5 (island III) Rev	CTTTTCTGTGCTATTCTGAGGAGTGTTGGTGTTGTTACTTCTGGGAAGTGATCTATGTCGGGTGCGGAGAAAGAGGTAATGAAATGG CGTCCGCCATCTCCAGCAGC
WI1-1879J12 (island IV) Fw	AATAAATGAACAGCGCTGCTCAGCTGCCCCTTCCCCCGTGGCTAGGCATT GCTCGAGGTCGACGGTATCG
WI1-1879J12 (island IV) Rev	TCTTAACAGAGTAGCTTCCTATGTGGAATGTCTGTGGTGGAAAGCGAGGAATCTATGTCGGGTGCGGAGAAAGAGGTAATGAAATGG CGTCCGCCATCTCCAGCAGC
WI1-1741G6 (island V) Fw	ACTGTTCCCTAATTAATACTAAGCCATATGCAAAAACATTCTTGAATACCATCTATGTCGGGTGCGGAGAAAGAGGTAATGAAATGGGCTCGAGGTCGACGGTATCG
WI1-1741G6 (island V) Rev	TCTTAACAGAGTAGCTTCCTATGTGGAATGTCTGTGGTGGAAAGCGAGGA CGTCCGCCATCTCCAGCAGC
WI1-1129A16 (between is-III/SB) Fw	TTTTGATCCTGAGGCAGCGGAAGACTGTGCCACACTAGATGTAACTTGAG GCTCGAGGTCGACGGTATCG
WI1-1129A16 (between is-III/SB) Rev	TGATTCTTACCAGACTCTAGTTGTCTGCATCCCAAGTTCCCTACTAGGAC ATCTATGTCGGGTGCGGAGAAAGAGGTAATGAAATGG CGTCCGCCATCTCCAGCAGC
WI1-109B16 (between is-V/GT2) Fw	CACCCAGTTTTTTTAATCCTGCCGGATCTTTGCATTGACGGTGGCTGTAAGCTCGAGGTCGACGGTATCG
WI1-109B16 (between is-V/GT2) Rev	CAAGCATCTCCTCTTTGGTGTCTCAGAAGCAGTTGGCTAAATGAGCTCCTATCTATGTCGGGTGCGGAGAAAGAGGTAATGAAATGG CGTCCGCCATCTCCAGCAGC
Homology Arm - restriction site (PISceI) - Primer
