# Supplementary material for: A complex regulatory landscape involved in the development of mammalian external genitals
Source: eLife. 2020 Apr 17;9:e52962. doi: 10.7554/eLife.52962 (PMC7185996; doi:10.7554/eLife.52962)
Supplement: Supplementary file 5. [file elife-52962-supp5.xlsx]

## Sheet: Table 5
Table 5: List of 4C-seq primers
Viewpoint		Sequence (5' > 3')
Hoxd13	iF	AATGATACGGCGACCACCGAACACTCTTTCCCTACACGACGCTCTTCCGATCT
		XXXXAAAATCCTAGACCTGGTCATG
	iR	CAAGCAGAAGACGGCATACGAGGCCGATGGTGCTGTATAGG
GT2	iF	AATGATACGGCGACCACCGAACACTCTTTCCCTACACGACGCTCTTCCGATCT
		XXXXTTCTCTCTTTTAGTGACCTTGGAACA
	iR	CAAGCAGAAGACGGCATACGAAGAAATATCCAAAGGTAAAAATCAAGAA
island V	iF	AATGATACGGCGACCACCGAACACTCTTTCCCTACACGACGCTCTTCCGATCT
		XXXXGCTACAAGACTCATTCGTTTAA
	iR	CAAGCAGAAGACGGCATACGAAACTAACTTAAGTCCCCTCG
island IV	iF	AATGATACGGCGACCACCGAACACTCTTTCCCTACACGACGCTCTTCCGATCT
		XXXXTACAGCCTAGTCTTTTCTCATCACAT
	iR	CAAGCAGAAGACGGCATACGATGTAATTATTTCAGGGTTGGAGTAGAATCA
XXXX – Corresponds to possible barcode sequences
