# Supplementary material for: A complex regulatory landscape involved in the development of mammalian external genitals
Source: eLife. 2020 Apr 17;9:e52962. doi: 10.7554/eLife.52962 (PMC7185996; doi:10.7554/eLife.52962)
Supplement: Supplementary file 6. [file elife-52962-supp6.xlsx]

## Sheet: Replicate status
Experiment	Sample name	Figure	Replicates	Comment
ATAC-seq	CR_E10_5_WT_ATAC_seq_rep1	Figure 1; Figure 3; Figure 6 - figure supplement 1; Figure 8	n=2
ATAC-seq	CR_E10_5_WT_ATAC_seq_rep2	Figure 1; Figure 3; Figure 6 - figure supplement 1; Figure 8	n=2
ATAC-seq	GT_E13_5_WT_ATAC_seq_rep1	Figure 1; Figure 3; Figure 4; Figure 5; Figure 6 - figure supplement 1; Figure 7 - figure supplement 1; Figure 8	n=3
ATAC-seq	GT_E13_5_WT_ATAC_seq_rep2	Figure 1; Figure 3; Figure 4; Figure 5; Figure 6 - figure supplement 1; Figure 7 - figure supplement 1; Figure 8	n=3
ATAC-seq	GT_E13_5_WT_ATAC_seq_rep3	Figure 1; Figure 3; Figure 4; Figure 5; Figure 6 - figure supplement 1; Figure 7 - figure supplement 1; Figure 8	n=3
ATAC-seq	GT_E17_5_WT_ATAC_seq_rep1	Figure 1; Figure 3	n=2
ATAC-seq	GT_E17_5_WT_ATAC_seq_rep2	Figure 1; Figure 3	n=2
RNA-seq	GT_16_5_RNAseq_rep1	Figure 1; Figure 1 - figure supplement 1	n=2
RNA-seq	GT_16_5_RNAseq_rep2	Figure 1; Figure 1 - figure supplement 1	n=2
RNA-seq	GT_18_5_RNAseq_rep1	Figure 1; Figure 1 - figure supplement 1	n=2
RNA-seq	GT_18_5_RNAseq_rep2	Figure 1; Figure 1 - figure supplement 1	n=2
ChIP-seq	CR_E10_5_H3K27ac	Figure 1	n=1	The datasets in Figure 1 are complementary to one another and in line with numerous datasets obtained over the HoxD cluster in the laboratory, for these reasons only one experiment was carried out.
ChIP-seq	CR_E10_5_H3K27me3	Figure 1	n=1	The datasets in Figure 1 are complementary to one another and in line with numerous datasets obtained over the HoxD cluster in the laboratory, for these reasons only one experiment was carried out.
ChIP-seq	GT_E13_5_H3K27ac	Figure 1; Figure 5	n=1	The datasets in Figure 1 are complementary to one another and in line with numerous datasets obtained over the HoxD cluster in the laboratory, for these reasons only one experiment was carried out.
ChIP-seq	GT_E13_5_H3K27me3	Figure 1	n=1	The datasets in Figure 1 are complementary to one another and in line with numerous datasets obtained over the HoxD cluster in the laboratory, for these reasons only one experiment was carried out.
ChIP-seq	GT_E17_5_H3K27ac	Figure 1	n=1	The datasets in Figure 1 are complementary to one another and in line with numerous datasets obtained over the HoxD cluster in the laboratory, for these reasons only one experiment was carried out.
ChIP-seq	GT_E17_5_H3K27me3	Figure 1	n=1	The datasets in Figure 1 are complementary to one another and in line with numerous datasets obtained over the HoxD cluster in the laboratory, for these reasons only one experiment was carried out.
4C-seq	CR_E10_5_WT_Hoxd13VP	Figure 2	n=1	This experiment is part of a time series that contains several developmental time-points and also complementary view-points. Because the various time-points cross-control each other, only one experiment was carried out.
4C-seq	FB_E12_5_WT_Hoxd13VP	Figure 2	n=1	This experiment is part of a time series that contains several developmental time-points and also complementary view-points. Because the various time-points cross-control each other, only one experiment was carried out.
4C-seq	GT_E12_5_WT_Hoxd13VP	Figure 2	n=1	This experiment is part of a time series that contains several developmental time-points and also complementary view-points. Because the various time-points cross-control each other, only one experiment was carried out.
4C-seq	GT_E13_5_WT_rep1_Hoxd13VP	Figure 2; Figure 4; Figure 6 - figure supplement 1; Figure 7	n=2
4C-seq	GT_E15_5_WT_Hoxd13VP	Figure 2	n=1	This experiment is part of a time series that contains several developmental time-points and also complementary view-points. Because the various time-points cross-control each other, only one experiment was carried out.
4C-seq	GT_E17_5_WT_Hoxd13VP	Figure 2	n=1	This experiment is part of a time series that contains several developmental time-points and also complementary view-points. Because the various time-points cross-control each other, only one experiment was carried out.
4C-seq	FB_E12_5_WT_GT2VP	Figure 2-figure supplement 1	n=1	This experiment is part of a time series that contains several developmental time-points and also complementary view-points. Because the various time-points cross-control each other, only one experiment was carried out.
4C-seq	FB_E12_5_WT_islandVVP	Figure 2-figure supplement 1	n=1	This experiment is part of a time series that contains several developmental time-points and also complementary view-points. Because the various time-points cross-control each other, only one experiment was carried out.
4C-seq	GT_E12_5_WT_GT2VP	Figure 2-figure supplement 1	n=1	This experiment is part of a time series that contains several developmental time-points and also complementary view-points. Because the various time-points cross-control each other, only one experiment was carried out.
4C-seq	GT_E12_5_WT_islandVVP	Figure 2-figure supplement 1	n=1	This experiment is part of a time series that contains several developmental time-points and also complementary view-points. Because the various time-points cross-control each other, only one experiment was carried out.
4C-seq	GT_E13_5_WT_GT2VP	Figure 2-figure supplement 1	n=1	This experiment is part of a time series that contains several developmental time-points and also complementary view-points. Because the various time-points cross-control each other, only one experiment was carried out.
4C-seq	GT_E13_5_WT_rep1_islandVVP	Figure 2-figure supplement 1; Figure 7	n=2
4C-seq	GT_E15_5_WT_GT2VP	Figure 2-figure supplement 1	n=1	This experiment is part of a time series that contains several developmental time-points and also complementary view-points. Because the various time-points cross-control each other, only one experiment was carried out.
4C-seq	GT_E15_5_WT_islandVVP	Figure 2-figure supplement 1	n=1	This experiment is part of a time series that contains several developmental time-points and also complementary view-points. Because the various time-points cross-control each other, only one experiment was carried out.
4C-seq	GT_E17_5_WT_GT2VP	Figure 2-figure supplement 1	n=1	This experiment is part of a time series that contains several developmental time-points and also complementary view-points. Because the various time-points cross-control each other, only one experiment was carried out.
4C-seq	GT_E17_5_WT_islandVVP	Figure 2-figure supplement 1	n=1	This experiment is part of a time series that contains several developmental time-points and also complementary view-points. Because the various time-points cross-control each other, only one experiment was carried out.
4C-seq	GT_E13_5_WT_rep2_Hoxd13VP	Figure 4; Figure6 - figure supplement 1; Figure 7	n=2
4C-seq	GT_E13_5_delProx_rep1_Hoxd13VP	Figure 4	n=2
4C-seq	GT_E13_5_delProx_rep2_Hoxd13VP	Figure 4	n=2
ATAC-seq	GT_E13_5_delProx_ATAC_seq_rep1	Figure 4	n=2
ATAC-seq	GT_E13_5_delProx_ATAC_seq_rep2	Figure 4	n=2
4C-seq	GT_E13_5_delGT2_rep1_Hoxd13VP	Figure 6 - figure supplement 1	n=2
4C-seq	GT_E13_5_delGT2_rep2_Hoxd13VP	Figure 6 - figure supplement 1	n=2
ATAC-seq	GT_E13_5_delGT2_ATAC_seq_rep1	Figure 6 - figure supplement 1	n=2
ATAC-seq	GT_E13_5_delGT2_ATAC_seq_rep2	Figure 6 - figure supplement 1	n=2
4C-seq	GT_E13_5_InvV_rep1_Hoxd13VP	Figure 7	n=2
4C-seq	GT_E13_5_InvV_rep1_island_IVVP	Figure 7	n=2
4C-seq	GT_E13_5_InvV_rep1_island_VVP	Figure 7	n=2
4C-seq	GT_E13_5_InvV_rep2_Hoxd13VP	Figure 7	n=2
4C-seq	GT_E13_5_InvV_rep2_island_IVVP	Figure 7	n=2
4C-seq	GT_E13_5_InvV_rep2_island_VVP	Figure 7	n=2
4C-seq	GT_E13_5_WT_rep1_island_IVVP	Figure 7	n=2
4C-seq	GT_E13_5_WT_rep2_islandVVP	Figure 7	n=2
4C-seq	GT_E13_5_WT_rep2_island_IVVP	Figure 7	n=2
4C-seq	GT_E13_5_delV_rep1_Hoxd13VP	Figure 7	n=2
4C-seq	GT_E13_5_delV_rep1_island_IVVP	Figure 7	n=2
4C-seq	GT_E13_5_delV_rep2_Hoxd13VP	Figure 7	n=2
4C-seq	GT_E13_5_delV_rep2_island_IVVP	Figure 7	n=2
CnR	GT_E13_5_InvV_CnR_CTCF	Figure 7	n=1	These datasets were generated to control for the absence (in DelV) or presence (in InvV) of CTCF binding on island V, these experiments were done in singletons.
ChIP-seq	GT_E13_5_WT_CTCF	Figure 7	n=1	These datasets were generated to control for the absence (in DelV) or presence (in InvV) of CTCF binding on island V, these experiments were done in singletons.
ChIP-seq	GT_E13_5_delV_CTCF	Figure 7	n=1	These datasets were generated to control for the absence (in DelV) or presence (in InvV) of CTCF binding on island V, these experiments were done in singletons.
ATAC-seq	GT_E13_5_delV_ATAC_seq_rep1	Figure 7 - figure supplement 1	n=2
ATAC-seq	GT_E13_5_delV_ATAC_seq_rep2	Figure 7 - figure supplement 1	n=2
ATAC-seq	GT_E13_5_invV_ATAC_seq_rep1	Figure 7 - figure supplement 1	n=2
ATAC-seq	GT_E13_5_invV_ATAC_seq_rep2	Figure 7 - figure supplement 1	n=2
CnR	CR_E10_5_WT_CnR_HoxA13	Figure 8	n=1	In these series of experiments only the day E13.5 was replicated with high correlation of peaks in the C-DOM.
CnR	GT_E13_5_WT_CnR_HoxA13_rep1	Figure 8	n=2
CnR	GT_E13_5_WT_CnR_HoxA13_rep2	Figure 8	n=2
