# Supplementary figures and images for: A complex regulatory landscape involved in the development of mammalian external genitals
Source: eLife journal article supplement (doi:10.7554/elife.52962), 2020-04-17

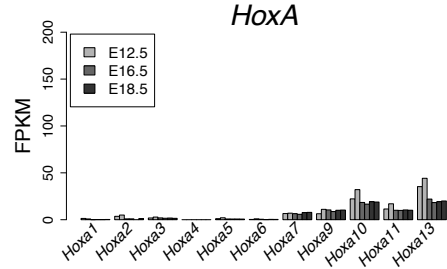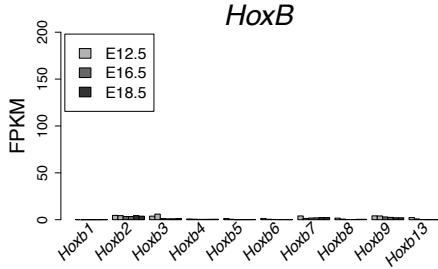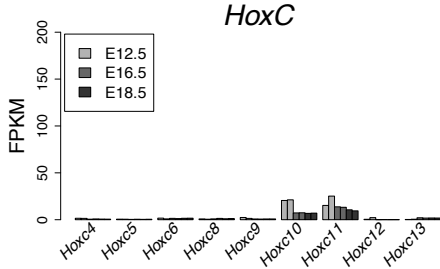

Supplement: supp [file elife_poa_e52962_Figure_1_figure_supplement_1.pdf › elife_poa_e52962_Figure_1_figure_supplement_1.pdf]

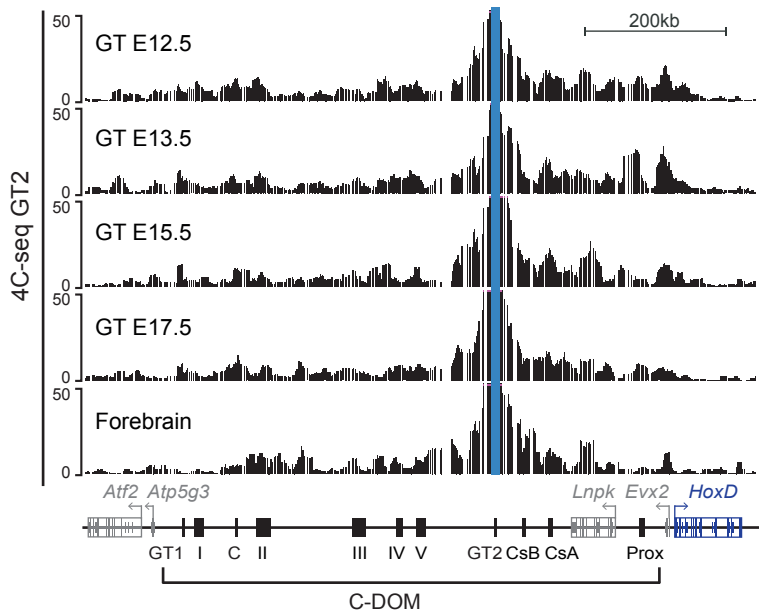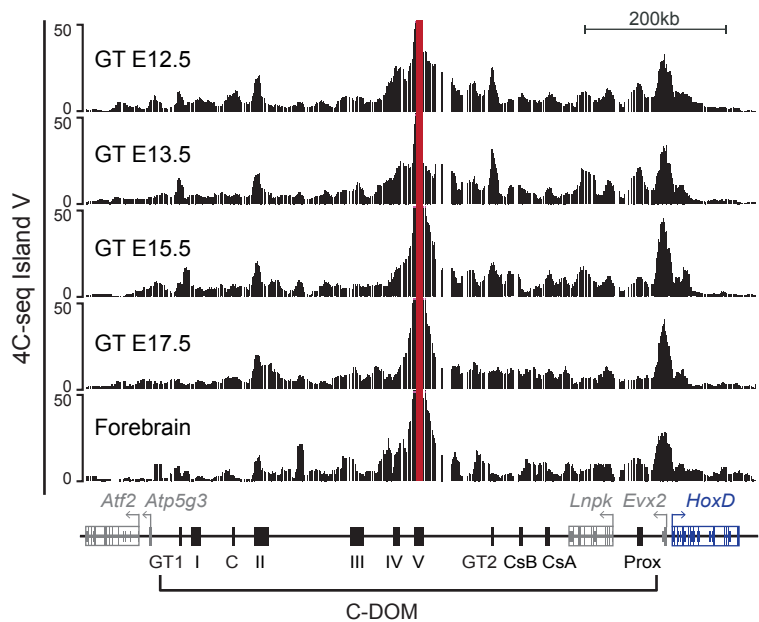

Supplement: supp [file elife_poa_e52962_Figure_2_figure_supplement_1.pdf › elife_poa_e52962_Figure_2_figure_supplement_1.pdf]

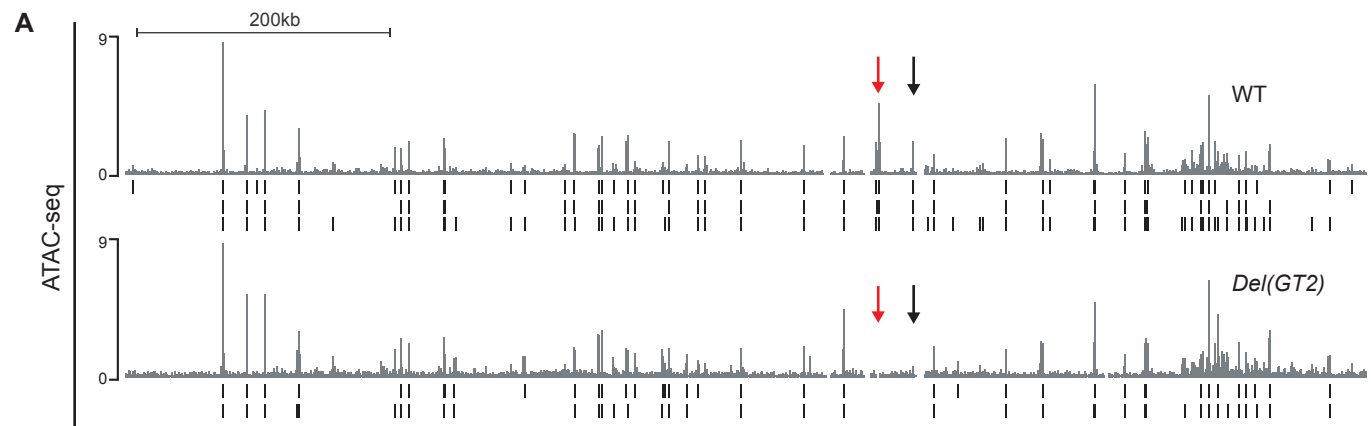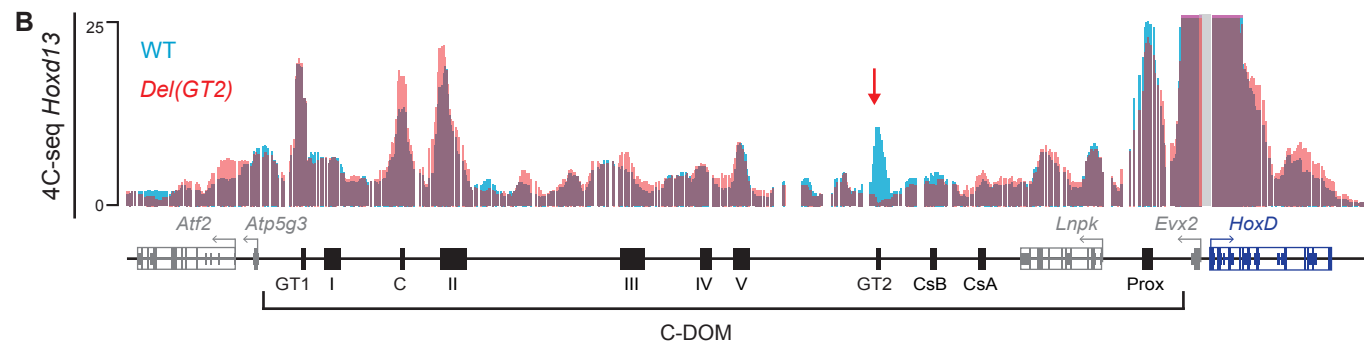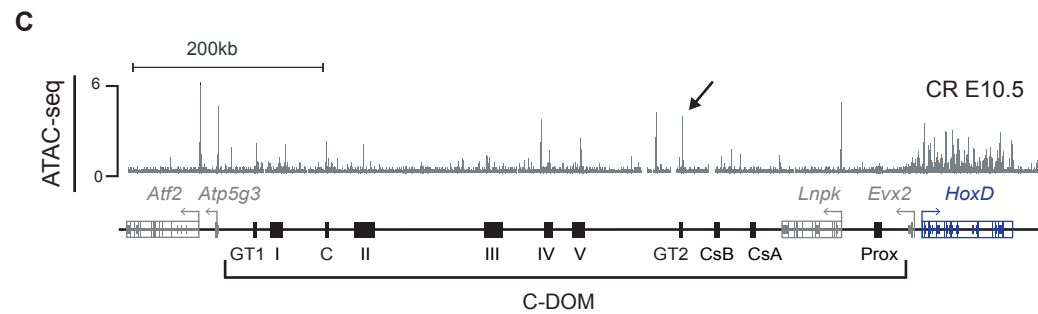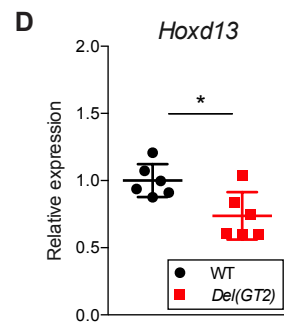

Supplement: supp [file elife_poa_e52962_Figure_6_figure_supplement_1.pdf › elife_poa_e52962_Figure_6_figure_supplement_1.pdf]

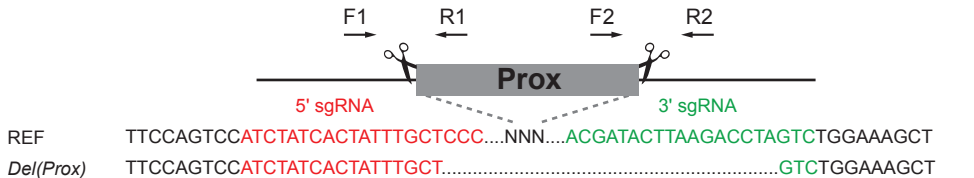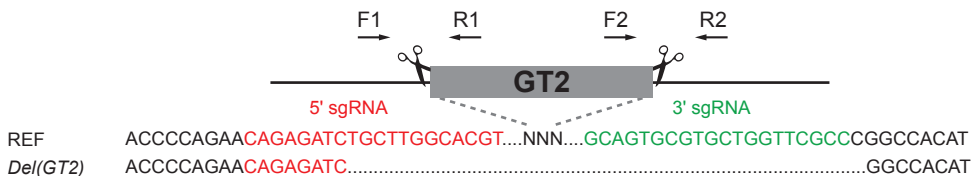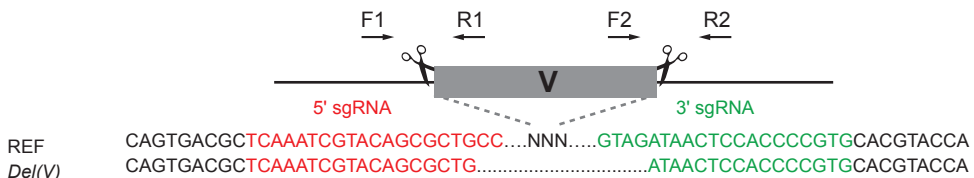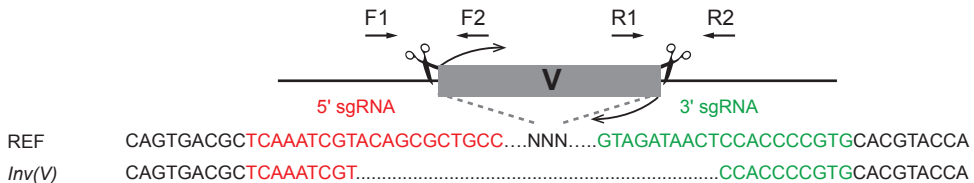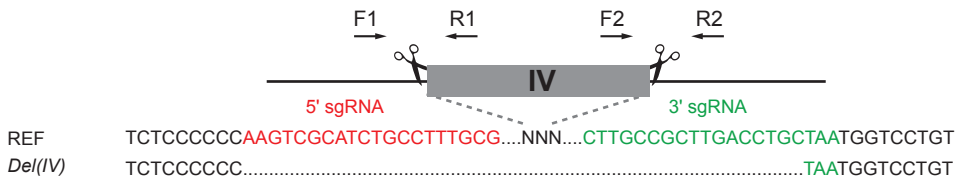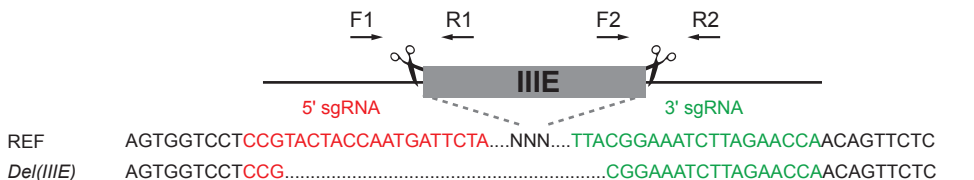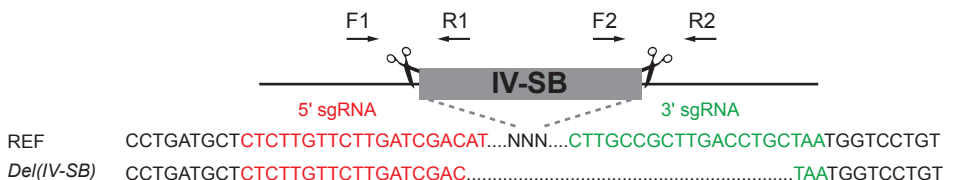

Supplement: supp [file elife_poa_e52962_Figure_6_figure_supplement_2.pdf › elife_poa_e52962_Figure_6_figure_supplement_2.pdf]

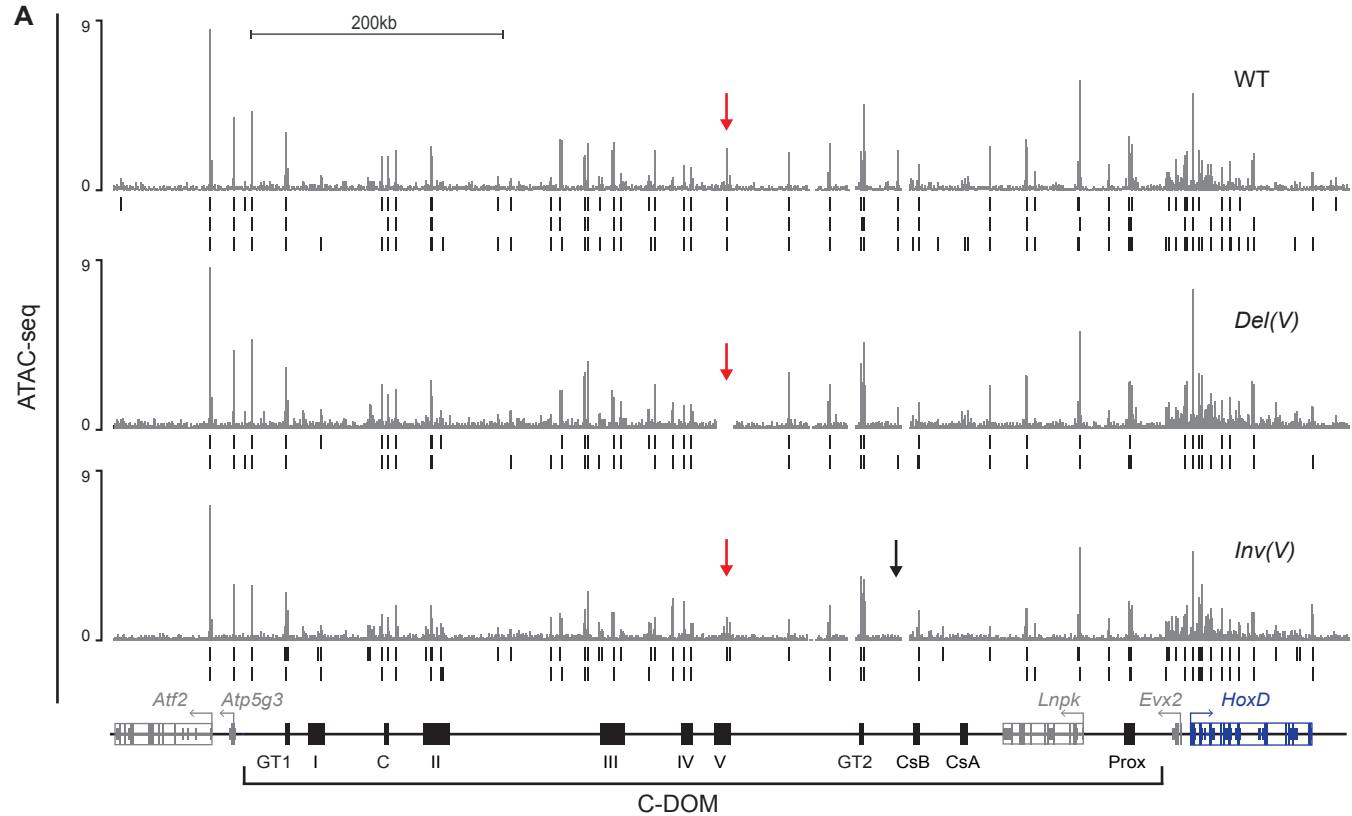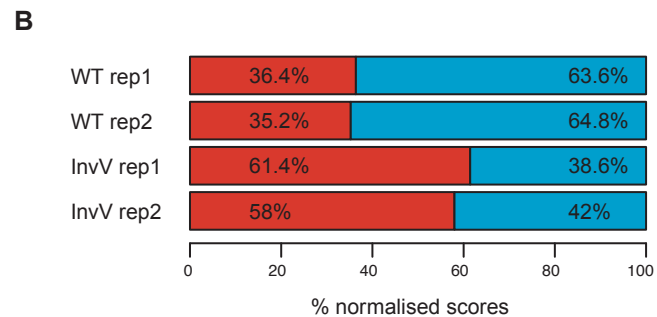

Supplement: supp [file elife_poa_e52962_Figure_7_figure_supplement_1.pdf › elife_poa_e52962_Figure_7_figure_supplement_1.pdf]
